# Supplementary material
Source: PubMed Central journal article supplement (PMC3997145)
Supplement: Supp_Fig1.pdf [file Supp_Fig1.pdf]

## Supplementary Data

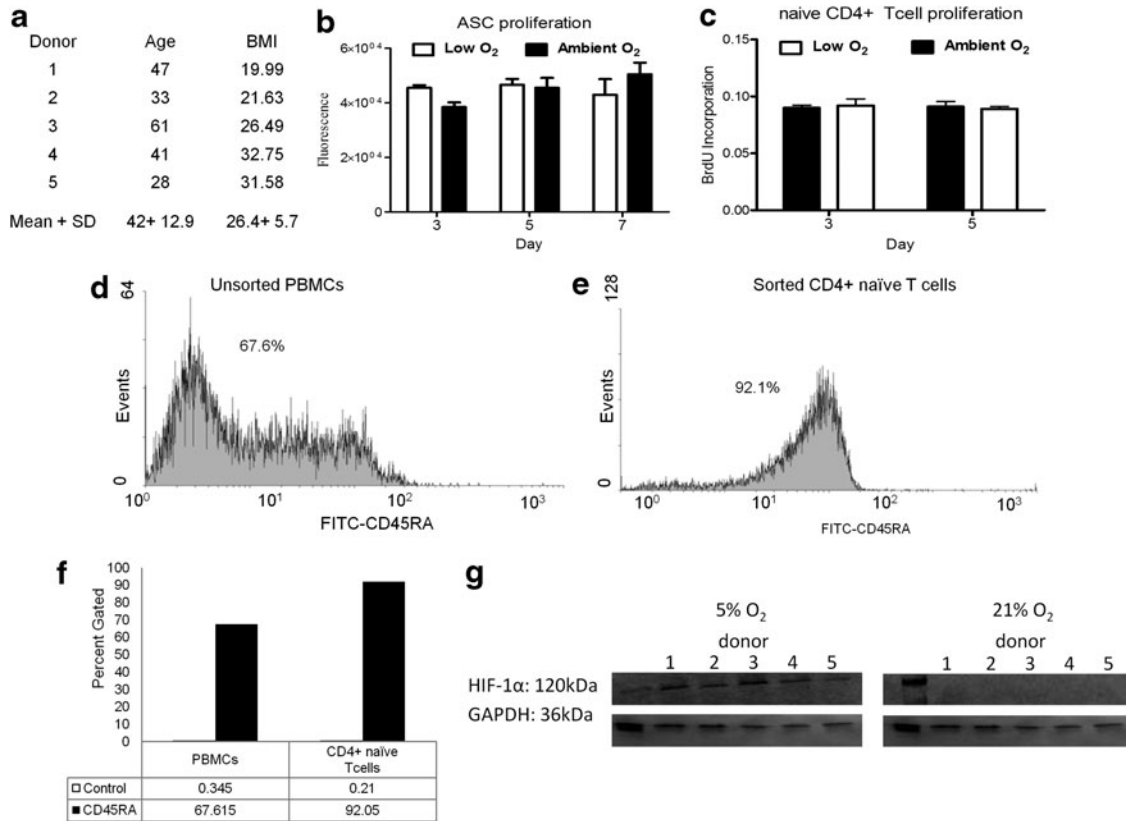

**SUPPLEMENTARY FIG. S1.** Adipose tissue stromal/stem cells (ASCs) and naive T-cell proliferation and cytokine secretions under low  $O_2$  culture conditions. **(a)** Donor list for ASCs used in the present study. All ASCs were isolated from subcutaneous adipose lipoaspirates from healthy Caucasian female donors. ASCs were used at passages 2 or 3 for the study. **(b)** ASCs were treated with 400 U/mL interferon-gamma ( $IFN-\gamma$ ) and cultured under ambient (21%  $O_2$ ) conditions or low (5%  $O_2$ ) culture conditions for 3, 5, and 7 days. **(c)** T cells isolated from peripheral blood mononuclear cells (PBMCs) were similarly cultured under ambient  $O_2$  or low  $O_2$  culture conditions for 3 or 5 days. Cell proliferation was assessed by the CyQUANT assay. **(d, e)** Naive T cells ( $CD4^+$ ,  $CD45RA^+$ ) were isolated by negative selection from PBMCs using the Miltenyi Biotec naive  $CD4^+$  T-cell kit. Cells were incubated with antibodies for fluorescein isothiocyanate (FITC)-CD4 and phycoerythrin (PE)-CD45RA and subjected to flow cytometry to determine percent purity of selection. **(f)** Quantification of isolated naive T-cell percent purity following flow cytometry. **(g)** Stabilization of hypoxia-inducible factor-1 alpha (HIF-1 $\alpha$ ) protein in ASCs following 3-day exposure to 5%  $O_2$ . Three independent sets of experiments were performed for each treatment. Data are reported as mean ( $\mu$ )  $\pm$  standard error (SE) of integrated density measurements using an Odyssey Li-COR scanner. Significance was set at  $P < 0.05$ .
