# Supplementary material
Source: PubMed Central journal article supplement (PMC3997145)
Supplement: Supp_Fig2.pdf [file Supp_Fig2.pdf]

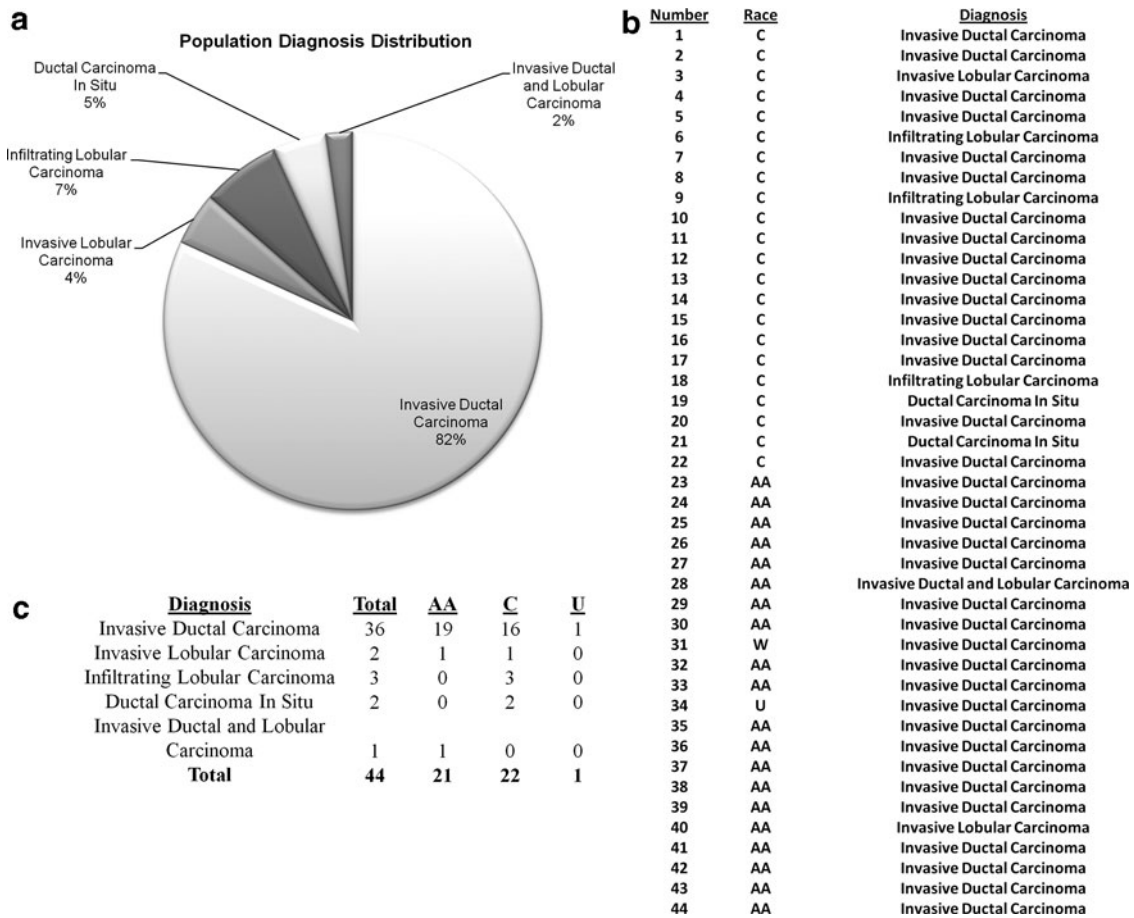

**SUPPLEMENTARY FIG. S2.** Demographics and invasive breast carcinoma sample population distribution of PBMC donors. **(a)** Venn diagram reporting total sample population percentages of invasive ductal carcinoma (82%), invasive ductal/lobular carcinomas (2%), ductal carcinoma in situ (5%), infiltrating lobular carcinoma (7%), and invasive lobular carcinoma (4%). **(b)** Table of patient donor demographics reporting a number of African American (AA), Caucasian (C), and unknown race patients (U). **(c)** Tabular representation of total sample population percentages for each racial group.
