# Supplementary material
Source: PubMed Central journal article supplement (PMC3997145)
Supplement: Supp_Fig3.pdf [file Supp_Fig3.pdf]

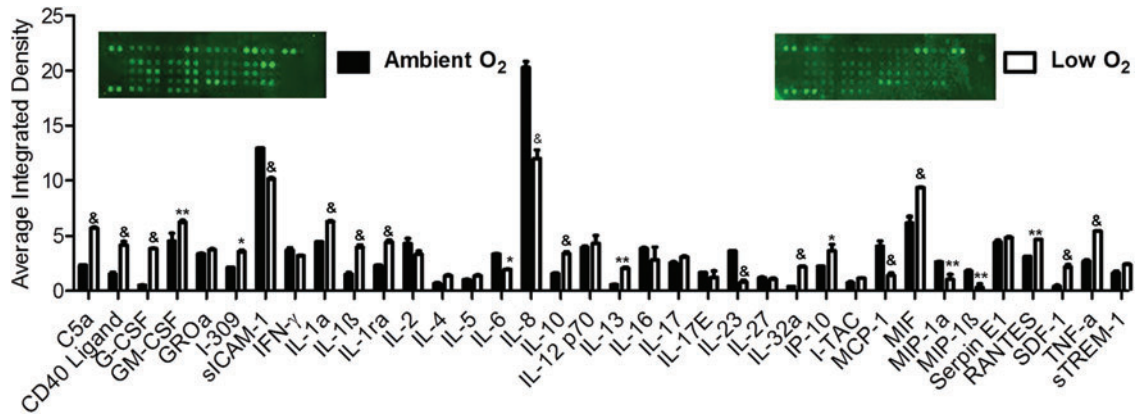

**SUPPLEMENTARY FIG. S3.** Cytokine/chemokine secretions from naive CD4<sup>+</sup> T cells under low or ambient O<sub>2</sub> culture conditions. A human proteome profiler array (Human Cytokine Array Panel A membrane; R&D Systems) was probed to assess alterations in secretions from naive CD4<sup>+</sup> T cells. Data were analyzed using Graphpad Prism version 5.0 and a two-way analysis of variances was used followed by Bonferroni's post-test to evaluate statistical relevance. Data are reported as mean ( $\mu$ )  $\pm$  SE of integrated density measurements using an Odyssey Li-COR scanner. \* $P$  < 0.05, \*\* $P$  < 0.001, & $P$  < 0.0001.
